# Supplementary material for: Graft Immune Cell Composition Associates with Clinical Outcome of Allogeneic Hematopoietic Stem Cell Transplantation in Patients with AML
Source: Front Immunol. 2016 Nov 21;7:523. doi: 10.3389/fimmu.2016.00523 (PMC5117118; doi:10.3389/fimmu.2016.00523)
Supplement: Supplementary file 1 [file table_1.xlsx]

## Sheet: Sheet 1
Supplementary Table 1
	acute GVHD no: 20, yes: 30	chronic GVHD no: 22, yes: 21, NA´s: 7	Relapse no: 40, yes: 9, NA's: 1	Rejection no: 46, yes: 4	Alive yes: 33, no: 17	CMV.viremia no: 24, yes: 26	aGVHDg	AML: aGVHD no: 11, yes: 13	AML: cGVHD no: 12, yes: 7, NA's: 4	AML: Relapse no: 18, yes: 4, NA's: 1	AML: Rejetion no: 20, yes: 3	AML: Alive yes: 15, no: 8	AML: CMV.viremia no: 11, yes: 12
AUC (SD) / Sens / Spec	0.61 (0.11) / 0.64 / 0.34	0.62 (0.11) / 0.48 / 0.5	0.67 (0.15) / 0.96 / 0.01	0.73 (0.15) / 1 / 0	0.64 (0.11) / 0.87 / 0.08	0.63 (0.11) / 0.39 / 0.45	-	0.78 (0.17) / 0.73 / 0.73	0.86 (0.17) / 0.9 / 0.7	0.81 (0.18) / 0.99 / 0	0.74 (0.16) / 0.95 / 0	0.71 (0.17) / 0.87 / 0.1	0.68 (0.16) / 0.28 / 0.57
CD123+ cells	yes: 1.09 (0.54-6.3) no: 0.99 (0.47-5.92) p = 0.56 vi: 47.64	yes: 1.2 (0.54-5.92) no: 0.93 (0.47-6.3) p = 0.2 vi: 62.66	yes: 0.83 (0.47-3.01) no: 1.145 (0.47-6.3) p = 0.53 vi: 66.73	yes: 0.785 (0.68-3.01) no: 1.09 (0.47-6.3) p = 0.37 vi: 50.57	yes: 1.19 (0.47-6.3) no: 0.97 (0.47-3.01) p = 0.2 vi: 85.71	yes: 1.195 (0.47-6.3) no: 0.93 (0.47-5.92) p = 0.14 vi: 91.13	p = 0.25	yes: 1.145 (0.55-6.3) no: 0.78 (0.47-1.31) p = 0.01 vi: 79.27	yes: 1.27 (0.66-1.77) no: 0.825 (0.47-6.3) p = 0.14 vi: 53.61	yes: 0.91 (0.47-1.77) no: 0.985 (0.47-6.3) p = 0.64 vi: 49.93	yes: 0.77 (0.68-0.8) no: 1.05 (0.47-6.3) p = 0.13 vi: 10.11	yes: 0.92 (0.47-6.3) no: 1.01 (0.47-1.29) p = 0.4 vi: 75.15	yes: 1.09 (0.47-6.3) no: 0.85 (0.47-1.42) p = 0.2 vi: 55.87
CD16+CD56+ cells	yes: 2.52 (0.71-5.59) no: 2.2 (0.5-9.88) p = 0.24 vi: 42.08	yes: 2.94 (0.71-9.88) no: 2.16 (0.5-6.02) p = 0.27 vi: 40.26	yes: 2.07 (0.5-9.88) no: 2.525 (0.7-6.02) p = 0.56 vi: 63.9	yes: 1.985 (0.5-9.88) no: 2.31 (0.7-6.02) p = 0.6 vi: 100	yes: 2.17 (0.7-6.02) no: 3.3 (0.5-9.88) p = 0.29 vi: 74.47	yes: 2.21 (0.5-5.59) no: 2.375 (0.7-9.88) p = 0.98 vi: 73.41	p = 0.4	yes: 2.27 (1.04-5.59) no: 1.92 (0.5-6.02) p = 0.35 vi: 36.77	yes: 1.97 (1.04-3.3) no: 2.56 (0.5-6.02) p = 0.71 vi: 42.55	yes: 1.535 (0.5-2.07) no: 2.945 (1.02-6.02) p = 0.12 vi: 90.93	yes: 1.02 (0.5-2.95) no: 2.27 (1.03-6.02) p = 0.12 vi: 100	yes: 2.94 (1.02-6.02) no: 1.875 (0.5-5.59) p = 0.36 vi: 74.77	yes: 1.995 (0.5-5.59) no: 2.37 (1.02-6.02) p = 0.88 vi: 64.57
CD19+ cells	yes: 4.225 (1.17-13.7) no: 3.97 (1.22-18.65) p = 0.3 vi: 78.91	yes: 4.85 (1.74-12.65) no: 3.755 (1.22-18.65) p = 0.14 vi: 67.56	yes: 3.05 (1.17-6.7) no: 4.19 (1.22-18.65) p = 0.18 vi: 62.55	yes: 2.98 (1.61-5.77) no: 4.085 (1.17-18.65) p = 0.42 vi: 39.25	yes: 3.97 (1.22-18.65) no: 4.05 (1.17-13.7) p = 0.84 vi: 59.45	yes: 4.26 (1.17-18.65) no: 4.01 (1.22-12.65) p = 0.55 vi: 54.03	p = 0.64	yes: 4.68 (1.17-9.27) no: 2.09 (1.22-5.44) p = 0.04 vi: 47.29	yes: 5.23 (1.74-9.27) no: 2.98 (1.22-6.36) p = 0.3 vi: 50.49	yes: 2.52 (1.17-3.62) no: 3.435 (1.22-9.27) p = 0.3 vi: 74.55	yes: 2.91 (1.61-3.05) no: 3.79 (1.17-9.27) p = 0.46 vi: 1.16	yes: 2.26 (1.22-9.27) no: 4.25 (1.17-7.09) p = 0.27 vi: 65.4	yes: 4.425 (1.17-7.09) no: 2.09 (1.22-9.27) p = 0.13 vi: 93.39
CD3- cells	yes: 79.65 (40.6-91.2) no: 85.775 (60.4-93.55) p = 0.18 vi: 88.96	yes: 81.6 (40.6-90.9) no: 85.5 (64.75-93.55) p = 0.14 vi: 25.45	yes: 87.05 (76.75-89.55) no: 82.925 (40.6-93.55) p = 0.47 vi: 41.24	yes: 87.675 (81.6-93.55) no: 82.925 (40.6-92.05) p = 0.13 vi: 50.83	yes: 85.7 (40.6-93.55) no: 80.65 (74.3-89.8) p = 0.2 vi: 73.07	yes: 83.125 (40.6-90.9) no: 83.15 (60.4-93.55) p = 0.4 vi: 70.65	p = 0.45	yes: 78.475 (72.05-89.8) no: 89.25 (77.2-93.55) p = 0 vi: 86.09	yes: 81.6 (74.75-88.05) no: 87.275 (72.05-93.55) p = 0.26 vi: 33.27	yes: 86.675 (79.65-89.55) no: 82.5 (72.05-93.55) p = 0.65 vi: 34.48	yes: 90.05 (85.3-93.55) no: 81.125 (72.05-92.05) p = 0.06 vi: 69.76	yes: 87.3 (72.05-93.55) no: 80.15 (74.75-89.8) p = 0.24 vi: 58.08	yes: 82.475 (72.05-89.8) no: 83.4 (77.2-93.55) p = 0.15 vi: 65.59
CD3+ lymphocytes	yes: 18.55 (8.42-39.2) no: 12.6 (5.01-35.6) p = 0.19	yes: 17.25 (6.03-39.2) no: 13.3 (5.01-28.35) p = 0.23	yes: 11.6 (10.07-20.7) no: 16.625 (5.01-39.2) p = 0.54	yes: 12.305 (5.01-16.5) no: 16.625 (6.03-39.2) p = 0.18	yes: 12.75 (5.01-39.2) no: 18 (9.3-24.95) p = 0.27	yes: 15.575 (6.03-39.2) no: 15.325 (5.01-35.6) p = 0.63	p = 0.47	yes: 19.1 (9.3-24.7) no: 10.15 (5.01-23.2) p = 0.01	yes: 17.25 (6.03-23.2) no: 12.58 (5.01-24.7) p = 0.5	yes: 13.175 (10.41-19.1) no: 17.05 (5.01-24.7) p = 1	yes: 9.86 (5.01-14.75) no: 17.45 (6.03-24.7) p = 0.11	yes: 11.6 (5.01-24.7) no: 19.275 (9.3-23.2) p = 0.15	yes: 16.925 (6.03-24.7) no: 16.85 (5.01-23.2) p = 0.36
CD34+ cells	yes: 0.945 (0.28-2.86) no: 1.01 (0.4-6.8) p = 0.72 vi: 98.24	yes: 1.19 (0.28-2.86) no: 0.92 (0.4-6.8) p = 0.44 vi: 48.19	yes: 1.27 (0.75-2.38) no: 0.985 (0.28-6.8) p = 0.35 vi: 31.4	yes: 1.09 (0.61-2.38) no: 0.995 (0.28-6.8) p = 1 vi: 31.94	yes: 1.02 (0.4-6.8) no: 0.97 (0.28-2.44) p = 0.89 vi: 64.48	yes: 1.055 (0.28-5.43) no: 0.995 (0.4-6.8) p = 0.51 vi: 62.89	p = 0.59	yes: 1.365 (0.49-2.86) no: 0.88 (0.4-2.82) p = 0.18 vi: 41.03	yes: 2.02 (0.88-2.86) no: 0.84 (0.4-1.99) p = 0.01 vi: 56.46	yes: 1.095 (0.75-2.02) no: 1.165 (0.4-2.86) p = 1 vi: 44.51	yes: 0.83 (0.61-1.35) no: 1.165 (0.4-2.86) p = 0.34 vi: 7.57	yes: 1.14 (0.4-2.86) no: 1.095 (0.75-2.44) p = 0.8 vi: 52.98	yes: 1.285 (0.75-2.82) no: 0.88 (0.4-2.86) p = 0.12 vi: 76.16
CD34/kg	yes: 5.7 (1.06-11.04) no: 5.54 (0.75-12.19) p = 0.84 vi: 42.16	yes: 4.33 (0.75-11.04) no: 5.645 (1.2-12.19) p = 0.23 vi: 61.83	yes: 6.8 (1.2-11) no: 5.25 (0.75-12.19) p = 0.31 vi: 56.81	yes: 5.305 (1.2-9.67) no: 5.645 (0.75-12.19) p = 0.69 vi: 51.21	yes: 5.33 (0.75-12.19) no: 6 (1.06-11) p = 0.51 vi: 71.6	yes: 5.33 (0.75-11.04) no: 5.7 (1.2-12.19) p = 0.85 vi: 65.15	p = 0.65	yes: 4.935 (1.06-7.38) no: 8.4 (2.74-12.19) p = 0.02 vi: 100	yes: 3.15 (1.06-9.57) no: 7.2 (2.74-12.19) p = 0.07 vi: 63.07	yes: 6.88 (2.5-8.4) no: 5.565 (1.06-12.19) p = 0.9 vi: 49.78	yes: 7.87 (2.74-9.67) no: 5.75 (1.06-12.19) p = 0.62 vi: 1.02	yes: 5.8 (2.5-12.19) no: 5.795 (1.06-8.4) p = 0.5 vi: 68.03	yes: 5.53 (1.06-11) no: 5.8 (2.74-12.19) p = 0.36 vi: 47.96
CD4+ T cells	yes: 9.435 (2.72-16.94) no: 6.815 (1.38-20.2) p = 0.27 vi: 100	yes: 8.29 (2.72-20.2) no: 5.88 (1.38-12.3) p = 0.07 vi: 56.37	yes: 5.71 (4.2-13.5) no: 8.19 (1.38-20.2) p = 0.27 vi: 70.11	yes: 5.385 (3.83-7.61) no: 7.88 (1.38-20.2) p = 0.14 vi: 34.76	yes: 7.14 (1.38-20.2) no: 7.64 (3.84-13.5) p = 0.13 vi: 100	yes: 7.425 (2.72-20.2) no: 7.625 (1.38-13.5) p = 0.49 vi: 64.85	p = 0.52	yes: 9.435 (3.84-13.1) no: 5.71 (3.83-10.26) p = 0.04 vi: 57.67	yes: 8.29 (4.2-13.1) no: 5.71 (3.83-11.9) p = 0.16 vi: 36.53	yes: 5.71 (4.2-7.18) no: 7.98 (3.83-13.1) p = 0.29 vi: 71.95	yes: 5.06 (3.83-5.71) no: 7.98 (3.84-13.1) p = 0.07 vi: 16.74	yes: 7.14 (3.83-11.9) no: 9.79 (3.84-13.1) p = 0.19 vi: 100	yes: 7.425 (3.84-13.1) no: 7.14 (3.83-12.4) p = 0.41 vi: 28.04
CD4+CD25+ T cells	yes: 1.39 (0.12-4.52) no: 1 (0.19-2.74) p = 0.14 vi: 67.66	yes: 1.35 (0.12-3.79) no: 1.035 (0.19-4.52) p = 0.33 vi: 51.58	yes: 0.56 (0.12-2.64) no: 1.33 (0.19-4.52) p = 0.04 vi: 100	yes: 0.445 (0.19-0.95) no: 1.325 (0.12-4.52) p = 0.03 vi: 62.31	yes: 1.22 (0.12-4.52) no: 1.23 (0.22-3.86) p = 0.92 vi: 65.01	yes: 1.335 (0.12-4.52) no: 1.035 (0.19-2.84) p = 0.59 vi: 81.78	p = 0.67	yes: 1.675 (0.12-4.52) no: 0.71 (0.19-2.34) p = 0.06 vi: 53.49	yes: 1.77 (0.12-2.34) no: 0.985 (0.19-4.52) p = 0.54 vi: 42.57	yes: 0.275 (0.12-1.23) no: 1.465 (0.19-4.52) p = 0.04 vi: 100	yes: 0.33 (0.19-0.95) no: 1.39 (0.12-4.52) p = 0.09 vi: 3.23	yes: 1.05 (0.12-4.52) no: 1.33 (0.22-3.86) p = 0.97 vi: 53.69	yes: 1.56 (0.12-4.52) no: 1.02 (0.19-2.84) p = 0.45 vi: 34.57
CD8+ T cells	yes: 6.895 (2.32-12.45) no: 5.27 (2.5-23.4) p = 0.18 vi: 52.66	yes: 7.29 (3.08-23.4) no: 4.925 (2.5-14.75) p = 0.05 vi: 100	yes: 5.4 (3.55-10.85) no: 5.97 (2.32-23.4) p = 0.74 vi: 39.16	yes: 4.245 (2.5-6.32) no: 6.035 (2.32-23.4) p = 0.13 vi: 45.9	yes: 5.4 (2.5-23.4) no: 6.32 (2.32-10.85) p = 0.51 vi: 66.12	yes: 6.69 (2.32-12.45) no: 5.845 (2.5-23.4) p = 0.46 vi: 75.13	p = 0.51	yes: 7.6 (2.32-12.45) no: 3.68 (2.5-9.89) p = 0.03 vi: 81.19	yes: 7.29 (3.51-10.3) no: 4.34 (2.5-12.45) p = 0.34 vi: 33.35	yes: 5.45 (3.55-10.85) no: 6.895 (2.32-12.45) p = 0.97 vi: 66.58	yes: 3.68 (2.5-4.81) no: 6.895 (2.32-12.45) p = 0.12 vi: 8.21	yes: 6.09 (2.5-12.45) no: 6.73 (2.32-10.85) p = 0.83 vi: 63.42	yes: 7.6 (2.32-12.45) no: 5.4 (2.5-9.89) p = 0.21 vi: 38.99
CFU	yes: 98 (22-319) no: 109 (13-233) p = 0.65 vi: 34.46	yes: 103 (22-187) no: 109 (13-319) p = 0.79 vi: 44.69	yes: 111 (69-187) no: 97 (13-319) p = 0.32 vi: 34.01	yes: 105 (48-187) no: 103 (13-319) p = 0.94 vi: 56.82	yes: 110 (13-319) no: 98 (22-187) p = 0.71 vi: 75.14	yes: 102.5 (22-174) no: 103 (13-319) p = 0.72 vi: 70.79	p = 0.37	yes: 112 (58-319) no: 120 (48-171) p = 0.72 vi: 44.3	yes: 137 (108-174) no: 116 (48-319) p = 0.13 vi: 37.66	yes: 113.5 (69-137) no: 120 (48-319) p = 0.65 vi: 50.21	yes: 90 (48-120) no: 120 (56-319) p = 0.14 vi: 9.93	yes: 132 (48-319) no: 102.5 (69-174) p = 0.34 vi: 90.73	yes: 118 (69-174) no: 109 (48-319) p = 0.34 vi: 63.55
Cond (RIC / sekv)	p = 0.02 vi: 2.76 vi: 71.14	p = 0.45 vi: 0.83 vi: 9.63	p = 0.87 vi: 2.89 vi: 0.68	p = 0.75 vi: 11.94 vi: 0	p = 0.76 vi: 8.7 vi: 1.99	p = 0.92 vi: 4.95 vi: 0.59	-	p = 0.07 vi: 9.23 vi: 21.58	p = 0.7 vi: 2.62 vi: 9.5	p = 0.8 vi: 6.56 vi: 0	p = 0.77 vi: 0 vi: 0	p = 0.62 vi: 6.91 vi: 10.26	p = 0.76 vi: 0.18 vi: 15.05
Donor (MUD / SIB)	p = 1 vi: 0.89 vi: 3.5	p = 0.84 vi: 1.08 vi: 0.95	p = 1 vi: 0 vi: 1.12	p = 0.6 vi: 3.89 vi: 5.3	p = 0.03 vi: 18.73 vi: 13.07	p = 0.72 vi: 0 vi: 1.99	-	p = 1 vi: 4.36 vi: 0	p = 0.7 vi: 4.43 vi: 0	p = 0.58 vi: 4.69 vi: 13.94	p = 0.45 vi: 0.18 vi: 2.12	p = 0.36 vi: 10.33 vi: 0	p = 0.39 vi: 4.98 vi: 0
Graft	p = 1 vi: 0	p = 0.16 vi: 0	p = 1 vi: 1	p = 1 vi: 6.33	p = 1 vi: 0	p = 0.29 vi: 6.54	-	p = 0.32 vi: 8.54	p = 0 vi: 58.49	p = 1 vi: 1.58	p = 1 vi: 0	p = 1 vi: 4.38	p = 0.32 vi: 0.05
IS	p = 0.25 vi: 5.91	p = 0.02 vi: 39.53	p = 1 vi: 5.03	p = 0.62 vi: 12.84	p = 0.54 vi: 6.96	p = 0.77 vi: 4.32	-	p = 0.35 vi: 7.4	p = 0.1 vi: 16.38	p = 1 vi: 3.13	p = 1 vi: 0.42	p = 1 vi: 7.59	p = 0.35 vi: 5.86
Lymphocytes	yes: 15.75 (7.42-41.95) no: 18.625 (7.49-42.3) p = 0.86 vi: 66.28	yes: 17.8 (10.42-41.95) no: 15.9 (7.42-42.3) p = 0.17 vi: 47.31	yes: 15.3 (7.49-24.75) no: 16.9 (7.42-42.3) p = 0.27 vi: 59.1	yes: 14.225 (8.86-24.75) no: 16.9 (7.42-42.3) p = 0.52 vi: 41.55	yes: 15.95 (7.42-42.3) no: 16.495 (7.49-32.6) p = 0.97 vi: 65.7	yes: 16.09 (7.49-42.3) no: 17.15 (7.42-41.95) p = 0.56 vi: 55.47	p = 0.27	yes: 15.525 (8.38-41.95) no: 13.09 (8.86-24.05) p = 0.35 vi: 34.46	yes: 16.09 (12.65-41.95) no: 13.925 (8.86-34) p = 0.14 vi: 34.23	yes: 15.675 (8.38-16.9) no: 13.95 (8.86-41.95) p = 0.84 vi: 82.54	yes: 12.4 (8.86-16.05) no: 15.525 (8.38-41.95) p = 0.23 vi: 3.77	yes: 14.6 (8.86-41.95) no: 16.07 (8.38-23.95) p = 0.83 vi: 59.24	yes: 15.675 (8.38-34) no: 13.25 (8.86-41.95) p = 0.53 vi: 38
HLA Match	p = 0.56 vi: 13.98	p = 1 vi: 9.34	p = 0.5 vi: 13.53	p = 0.41 vi: 22.94	p = 0.29 vi: 28.32	p = 0.6 vi: 30.62	-	p = 0.41 vi: 29.07	p = 0.82 vi: 10.3	p = 0.3 vi: 51.87	p = 0.35 vi: 6.93	p = 0.83 vi: 21.26	p = 0.55 vi: 32.64
Monocytes	yes: 19.4 (5.63-37.75) no: 19.325 (4.12-29.4) p = 0.8 vi: 47.04	yes: 18.625 (4.31-28.5) no: 20.1 (4.12-31.85) p = 0.43 vi: 46.03	yes: 17.9 (8.585-29.4) no: 19.4 (4.12-34.05) p = 0.78 vi: 24.67	yes: 20.875 (8.585-26.1) no: 19.4 (4.12-37.75) p = 0.79 vi: 35.54	yes: 19.35 (4.12-31.85) no: 19.55 (5.63-37.75) p = 0.31 vi: 83.72	yes: 17.75 (4.12-34.05) no: 21.85 (5.73-37.75) p = 0.18 vi: 78.92	p = 0.73	yes: 16.375 (5.63-37.75) no: 22.65 (8.56-29.4) p = 0.53 vi: 43.1	yes: 8.56 (5.63-27) no: 23.15 (12.55-31.85) p = 0.01 vi: 100	yes: 21.825 (9.04-29.4) no: 18.425 (5.63-34.05) p = 0.59 vi: 50.36	yes: 22.65 (19.1-26.1) no: 17.65 (5.63-37.75) p = 0.51 vi: 1.27	yes: 19.1 (5.73-31.85) no: 21.825 (5.63-37.75) p = 0.55 vi: 78.51	yes: 16.375 (5.63-34.05) no: 23.65 (5.73-37.75) p = 0.21 vi: 100
total CD34	yes: 4.62 (0.96-7.48) no: 5.71 (0.61-10.37) p = 0.36	yes: 4.685 (0.61-7.5) no: 5.71 (2.72-10.37) p = 0.18	yes: 5.6 (0.78-7.13) no: 4.75 (0.61-10.37) p = 0.82	yes: 5.12 (0.78-7.74) no: 5.71 (0.61-10.37) p = 0.87	yes: 5.23 (0.61-10.37) no: 5.6 (0.78-7.48) p = 0.67	yes: 4.505 (0.61-10.37) no: 6.05 (0.78-8.81) p = 0.04	p = 0.63	yes: 4.41 (0.96-6.6) no: 6.9 (2.52-10.37) p = 0.01	yes: 2.52 (0.96-7.18) no: 5.9 (4.2-10.37) p = 0.15	yes: 5.12 (4.41-6.9) no: 5.805 (0.96-10.37) p = 1	yes: 6.43 (5.12-7.74) no: 5.805 (0.96-10.37) p = 0.55	yes: 6.05 (2.52-10.37) no: 4.765 (0.96-6.9) p = 0.12	yes: 4.41 (0.96-10.37) no: 6.6 (5.71-8.53) p = 0.02
Supporting InfoTable 1. Results from statistical analyses and classifications.Each column shows results for one clinical endpoint. Number of cases in each outcome category (e.g. aGVHD=yes/no) is given in the header. Classifiers were built for each different clinical endpoint and their performances are given as area under ROC curve (AUC), AUC standard deviation, sensitivity and specificity. In eac…
